# Supplementary material for: Elucidation of Nature of Gene Action and Estimation of Combining Ability Effects for Fruit Yield Improvement and Yield Attributing Traits in Brinjal Landraces
Source: Hindawi journal article supplement (doi:10.1155/2022/8471202), 2022-04-21
Supplement: f1 [file 8471202.f1.docx]

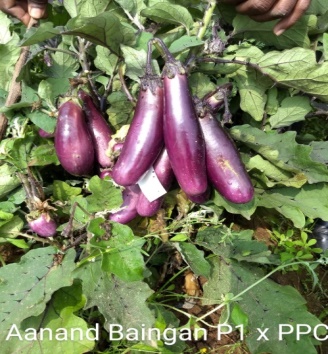
**
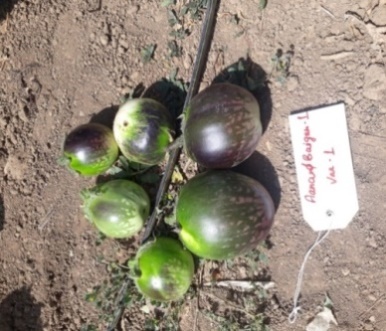

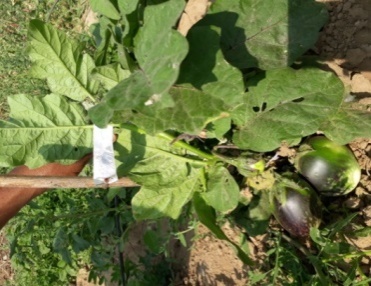
**

**X**


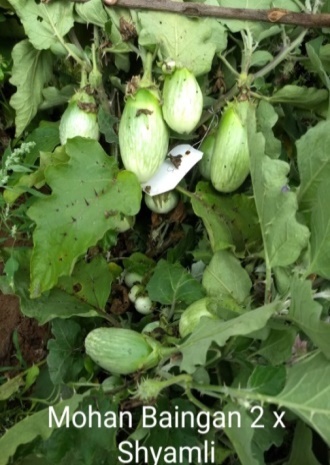

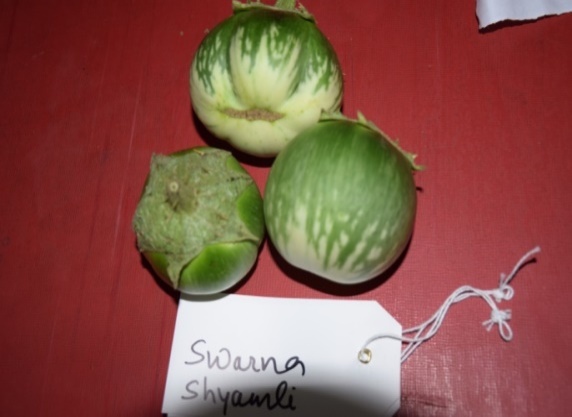

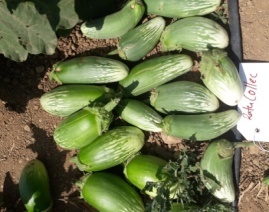

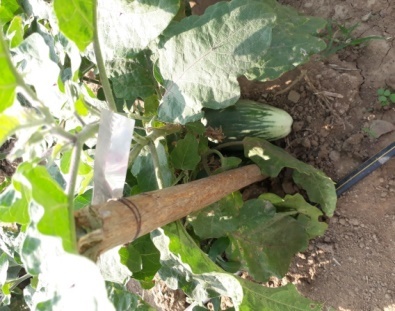


**RKML-26**

**PPC**

**F1**

**F1**

**S. Shyamli**

**RKML-2**

**X**

**F1**

**F1**

**X**


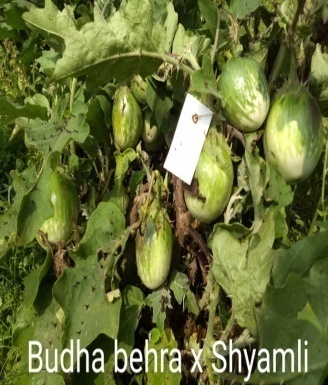

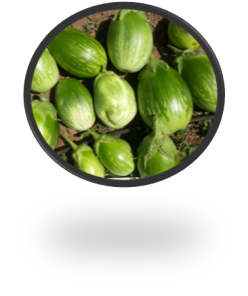

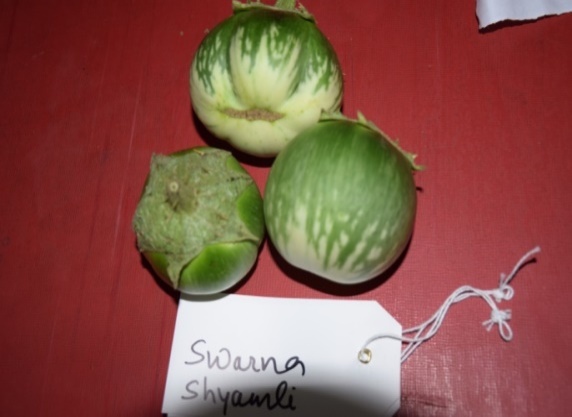

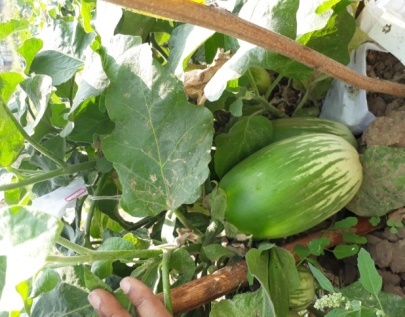


**F1**

**S. Shyamli**

**RKML-4**


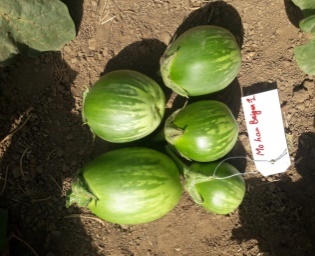

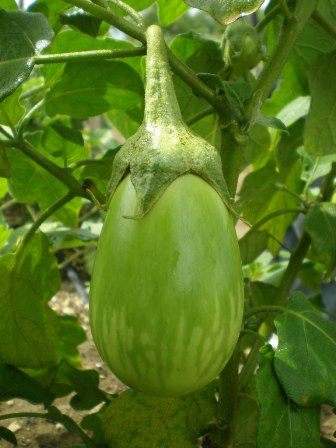


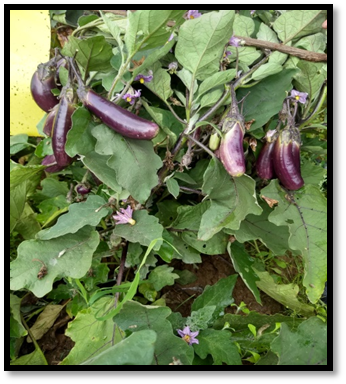


**X**

**F1**

**PPC**

**RKML-11**

Supplementary fig.1. Pictures of some promising F1s after crosses
